# Supplementary material for: Impacts of Gaseous Ozone (O3) on Germination, Mycelial Growth, and Aflatoxin B1 Production In Vitro and In Situ Contamination of Stored Pistachio Nuts
Source: MDPI journal article supplement (doi:10.3390/toxins14060416), 2022-06-17
Supplement: s1 [file s1]

# Impacts of Gaseous Ozone (O<sub>3</sub>) on Germination, Mycelial Growth, and Aflatoxin B<sub>1</sub> Production In Vitro and In Situ Contamination of Stored Pistachio Nuts

Alaa Baazeem, Angel Medina and Naresh Magan

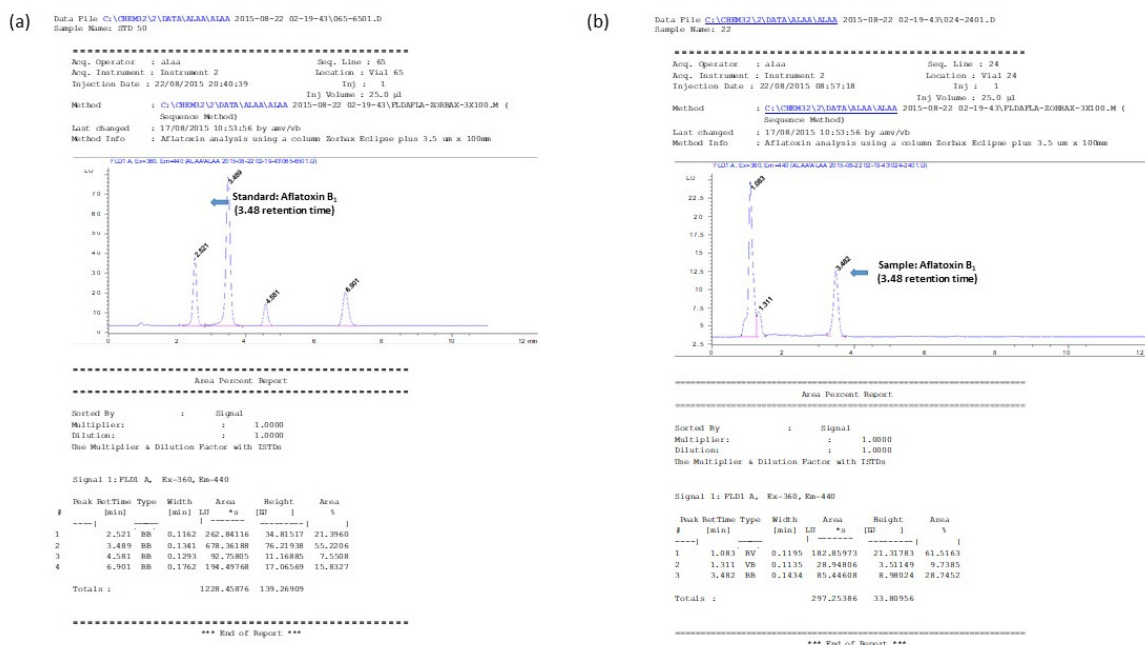

Figure S1. Examples of HPLC analyses of (a) a standard and (b) a sample of pistachio nut-based agar for aflatoxin B<sub>1</sub> quantification.
